# Supplementary material
Source: HighWire-hosted journal article supplement (https://www.cfp.ca/highwire/filestream/32043/field_highwire_adjunct_files/2/354_EvidenceTables.pdf)
Supplement: 354_EvidenceTables.pdf [file 354_EvidenceTables.pdf]

## Appendix 2: Evidence Tables

### I. On demand PPI vs Continuous PPI for maintenance therapy of reflux esophagitis and gastroesophageal reflux disease?<sup>1</sup>

| Quality assessment                                                 |                   |                      |                                       |                         |                        |                      | No of patients  |                | Effect                 |                                    | Quality       | Importance |
|--------------------------------------------------------------------|-------------------|----------------------|---------------------------------------|-------------------------|------------------------|----------------------|-----------------|----------------|------------------------|------------------------------------|---------------|------------|
| No of studies                                                      | Design            | Risk of bias         | Inconsistency                         | Indirectness            | Imprecision            | Other considerations | On demand PPI   | Continuous PPI | Relative (95% CI)      | Absolute                           |               |            |
| Lack of Symptom Control [1–5]                                      |                   |                      |                                       |                         |                        |                      |                 |                |                        |                                    |               |            |
| 5 <sup>2,3</sup>                                                   | randomised trials | serious <sup>4</sup> | no serious inconsistency              | no serious indirectness | serious <sup>5</sup>   | none                 | 140/859 (16.3%) | 73/794 (9.2%)  | RR 1.71 (1.31 to 2.21) | 7% (3 to 11%)                      | ⊕⊕⊕⊕ LOW      |            |
| Pill Use (tablets/week) (Better indicated by lower values) [1,2,5] |                   |                      |                                       |                         |                        |                      |                 |                |                        |                                    |               |            |
| 3 <sup>6</sup>                                                     | randomised trials | serious <sup>7</sup> | no serious inconsistency <sup>8</sup> | no serious indirectness | no serious imprecision | none                 | 571             | 581            | -                      | MD 3.79 lower (4.73 to 2.84 lower) | ⊕⊕⊕⊕ MODERATE |            |
| Satisfaction (unwilling to continue or inadequate relief) [1–5]    |                   |                      |                                       |                         |                        |                      |                 |                |                        |                                    |               |            |
| 5                                                                  | randomised trials | serious <sup>9</sup> | no serious inconsistency              | serious <sup>10</sup>   | serious <sup>11</sup>  | none                 | 136/859 (15.8%) | 70/794 (8.8%)  | RR 1.82 (1.26 to 2.65) | 7% (2 to 14%)                      | ⊕⊕⊕⊕ VERY LOW |            |

<sup>1</sup> Four studies used maintenance dose PPI on-demand (pantoprazole 20 mg/rabeprazole 10 mg/esomeprazole 20mg) while one study used healing dose PPI on-demand (pantoprazole 40 mg)

<sup>2</sup> Four studies did not report endoscopic findings

<sup>3</sup> Lack of symptom control defined as inadequate symptom relief or treatment failure (return of symptom(s) of at least moderate severity or symptoms incompatible with well-being)

<sup>4</sup> No low risk of bias trials (all studies with high risk of detection bias, three of five with high risk of attrition bias)

<sup>5</sup> 95% CI wide and close to line of no effect

<sup>6</sup> Studies used maintenance dose PPI on-demand (pantoprazole 20mg/rabeprazole 10 mg/esomeprazole 20mg)

<sup>7</sup> No low risk of bias trials (all three studies at high risk of detection and attrition bias)

<sup>8</sup> Statistically significant heterogeneity but not clinically important as all trials showed strong statistically significant benefit

<sup>9</sup> No low risk of bias trials (four studies at high risk of attrition and reporting bias)

<sup>10</sup> Evidence indirect as poor methods of satisfaction used (willingness to continue or "inadequate relief")

<sup>11</sup> 95% CI wide and close to line of no effect (for willingness to continue the result was not statistically significant)

## II. Maintenance dose PPI vs Healing dose PPI for maintenance therapy of reflux oesophagitis and gastroesophageal reflux disease

| Quality assessment                                |                   |                      |                          |                         |                                     |                      | No of patients       |                  | Effect                 |                | Quality          | Importance     |
|---------------------------------------------------|-------------------|----------------------|--------------------------|-------------------------|-------------------------------------|----------------------|----------------------|------------------|------------------------|----------------|------------------|----------------|
| No of studies                                     | Design            | Risk of bias         | Inconsistency            | Indirectness            | Imprecision                         | Other considerations | Maintenance dose PPI | Healing dose PPI | Relative (95% CI)      | Absolute       |                  |                |
| Oesophagitis relapse (endoscopic findings) [6–11] |                   |                      |                          |                         |                                     |                      |                      |                  |                        |                |                  |                |
| 6                                                 | randomised trials | serious <sup>1</sup> | no serious inconsistency | no serious indirectness | no serious imprecision <sup>2</sup> | none                 | 228/916 (24.9%)      | 186/1191 (15.6%) | RR 1.54 (1.25 to 1.89) | 8% (4 to 14%)  | ⊕⊕⊕O<br>MODERATE |                |
| Symptom relapse [6–10]                            |                   |                      |                          |                         |                                     |                      |                      |                  |                        |                |                  |                |
| 5 <sup>3,4</sup>                                  | randomised trials | serious <sup>1</sup> | serious <sup>5</sup>     | no serious indirectness | no serious imprecision              | none                 | 343/810 (42.3%)      | 470/1102 (42.6%) | RR 1.16 (0.93 to 1.44) | 7% (-3 to 19%) | ⊕⊕OO<br>LOW      | <sup>3,4</sup> |

<sup>1</sup> No low risk of bias trials (most trials had unclear risk of bias)

<sup>2</sup> 95% CI narrow and in favour of healing dose PPI, close to line of no effect

<sup>3</sup> Studies did not measure patient satisfaction

<sup>4</sup> Symptom relapse defined as return of symptom(s) of at least moderate severity(enough to interfere with normal activity) for three to seven consecutive days in five studies and return of symptom(s) of any severity in one study

<sup>5</sup> Statistically significant heterogeneity that was unexplained

### III. H2 receptor antagonist vs Healing dose PPI for maintenance therapy of reflux esophagitis and gastroesophageal reflux disease<sup>1</sup>

| Quality assessment                                  |                   |                      |                                       |                         |                                     |                      | No of patients         |                  | Effect                 |                 | Quality          | Importance |
|-----------------------------------------------------|-------------------|----------------------|---------------------------------------|-------------------------|-------------------------------------|----------------------|------------------------|------------------|------------------------|-----------------|------------------|------------|
| No of studies                                       | Design            | Risk of bias         | Inconsistency                         | Indirectness            | Imprecision                         | Other considerations | H2 receptor antagonist | Healing dose PPI | Relative (95% CI)      | Absolute        |                  |            |
| Esophagitis relapse (endoscopic findings) [7,12,13] |                   |                      |                                       |                         |                                     |                      |                        |                  |                        |                 |                  |            |
| 3                                                   | randomised trials | serious <sup>2</sup> | no serious inconsistency <sup>3</sup> | no serious indirectness | no serious imprecision              | none                 | 121/242 (50%)          | 36/242 (14.9%)   | RR 3.52 (1.8 to 6.87)  | 37% (12 to 87%) | ⊕⊕⊕O<br>MODERATE |            |
| Symptom relapse [7,12,13]                           |                   |                      |                                       |                         |                                     |                      |                        |                  |                        |                 |                  |            |
| 3 <sup>4,5</sup>                                    | randomised trials | serious <sup>2</sup> | no serious inconsistency              | no serious indirectness | no serious imprecision <sup>6</sup> | none                 | 91/232 (39.2%)         | 49/236 (20.8%)   | RR 1.92 (1.44 to 2.58) | 19% (9 to 33%)) | ⊕⊕⊕O<br>MODERATE |            |

<sup>1</sup> H2RA likely to increase pill burden as typically dosed twice daily

<sup>2</sup> No low risk of bias trials (most studies had unclear risk of bias)

<sup>3</sup> Statistically significant heterogeneity but not clinically important as all trials showed strong statistically significant benefit of standard dose PPI

<sup>4</sup> Studies did not measure patient satisfaction

<sup>5</sup> Symptom relapse defined as return of symptom(s) of at least moderate severity in two studies and at least mild severity in one study

<sup>6</sup> 95% CI narrow and in favour of healing dose PPI

IV. Abrupt discontinuation of PPI vs. continuation of PPI for maintenance therapy of reflux esophagitis and gastroesophageal reflux disease

| Quality assessment                                                         |                   |                           |                          |                         |                      |                      | No of patients |               | Effect                 |                                                | Quality          | Importance |
|----------------------------------------------------------------------------|-------------------|---------------------------|--------------------------|-------------------------|----------------------|----------------------|----------------|---------------|------------------------|------------------------------------------------|------------------|------------|
| No of studies                                                              | Design            | Risk of bias              | Inconsistency            | Indirectness            | Imprecision          | Other considerations | Deprescribing  | Continued Use | Relative (95% CI)      | Absolute                                       |                  |            |
| Lack of Symptom Control - Symptom Relapse Rate [14]                        |                   |                           |                          |                         |                      |                      |                |               |                        |                                                |                  |            |
| 1                                                                          | randomised trials | very serious <sup>1</sup> | no serious inconsistency | no serious indirectness | serious <sup>2</sup> | none                 | 38/56 (67.9%)  | 11/49 (22.4%) | RR 3.02 (1.74 to 5.24) | 453 more per 1000 (from 166 more to 952 more)  | ⊕○○○<br>VERY LOW |            |
|                                                                            |                   |                           |                          |                         |                      |                      |                | 22.5%         |                        | 454 more per 1000 (from 167 more to 954 more)  |                  |            |
| Adverse Drug Withdrawal Events (ADWE) - Relapse (Endoscopic Findings) [14] |                   |                           |                          |                         |                      |                      |                |               |                        |                                                |                  |            |
| 1                                                                          | randomised trials | very serious <sup>1</sup> | no serious inconsistency | no serious indirectness | serious <sup>2</sup> | none                 | 39/56 (69.6%)  | 10/49 (20.4%) | RR 3.41 (1.91 to 6.09) | 492 more per 1000 (from 186 more to 1000 more) | ⊕○○○<br>VERY LOW |            |
|                                                                            |                   |                           |                          |                         |                      |                      |                | 20.4%         |                        | 492 more per 1000 (from 186 more to 1000 more) |                  |            |

<sup>1</sup> Concerns surrounding attrition bias and blinding

<sup>2</sup> 95% CI wide, number of participants and events small

## References:

1. Bour B, Staub J-L, Chousterman M, Labayle D, Nalet B, Nouel O, et al. Long-term treatment of gastro-oesophageal reflux disease patients with frequent symptomatic relapses using rabeprazole: on-demand treatment compared with continuous treatment. *Aliment Pharmacol Ther.* 2005 Apr;21(7):805–12.
2. Janssen W, Meier E, Gatz G, Pfaffenberger B, Pfivate I. Effects of Pantoprazole 20 mg in Mild Gastroesophageal Reflux Disease : Once-Daily Treatment in the Acute Phase , and Comparison of On-Demand Versus Continuous Treatment in the Long Term. 2005;66(4):345–63.
3. Morgan DG, O'Mahony MFJ, O'Mahony WF, Roy J, Camacho F, Dinniwell J, et al. Maintenance treatment of gastroesophageal reflux disease: an evaluation of continuous and on-demand therapy with rabeprazole 20 mg. *Can J Gastroenterol.* 2007 Dec;21(12):820–6.
4. van der Velden AW, de Wit NJ, Quartero AO, Grobbee DE, Numans ME. Pharmacological dependency in chronic treatment of gastroesophageal reflux disease: a randomized controlled clinical trial. *Digestion.* 2010;81:43–52.
5. Bayerdörffer E, Bigard M-A, Weiss W, Mearin F, Rodrigo L, Dominguez Muñoz JE, et al. Randomized, multicenter study: on-demand versus continuous maintenance treatment with esomeprazole in patients with non-erosive gastroesophageal reflux disease. *BMC Gastroenterol* [Internet]. 2016 Dec 14;16(1):48. Available from: <http://bmcgastroenterol.biomedcentral.com/articles/10.1186/s12876-016-0448-x>
6. Escourrou J, Deprez P, Saggioro a, Geldof H, Fischer R, Maier C. Maintenance therapy with pantoprazole 20 mg prevents relapse of reflux oesophagitis. *Aliment Pharmacol Ther.* 1999 Nov;13(11):1481–91.
7. Gough a L, Long RG, Cooper BT, Fosters CS, Garrett a D, Langworthy CH. Lansoprazole versus ranitidine in the maintenance treatment of reflux oesophagitis. *Aliment Pharmacol Ther.* 1996 Aug;10(4):529–39.
8. Plein K, Hotz J, Wurzer H, Fumagalli I, Luhmann R SA. Pantoprazole 20 mg is an effective maintenance therapy for patients with gastro-oesophageal reflux disease. *Eur J Clin Pharmacol.* 2000;12:425–32.
9. Baldi F, Bardhan K, Borman B, Brullet E, Dent J, Galmiche J, et al. Lansoprazole maintains healing in patients with reflux esophagitis. *Gastroenterology.* 1996;(110):A55.
10. Hatlebakk JG, Berstad A. Lansoprazole 15 and 30 mg daily in maintaining healing and symptom relief in patients with reflux oesophagitis. *Aliment Pharmacol Ther* [Internet]. 1997 Apr;11(2):365–72. Available from: <http://www.ncbi.nlm.nih.gov/pubmed/9146777>
11. Poynard T, Staub J, Lemerez M, Deltenre M, Rekacevicz C, Sallerin V. Efficacy and safety of lansoprazole 15 mg oad or 30mg oad as one year maintenance treatment for erosive reflux esophagitis. A randomized trial. *Gastroenterology* [Internet]. 1995 Apr;108(4):A195. Available from: <http://linkinghub.elsevier.com/retrieve/pii/0016508595234411>
12. Annibale B, Franceschi M, Fusillo M, Beni M, Cesana B DFG. Omeprazole in patients with mild or moderate reflux esophagitis induces lower relapse rates than ranitidine during maintenance treatment. *Hepatogastroenterology.* 1998;45:742–51.
13. Dent J, Yeomans ND, Mackinnon M, Reed W, Narielvala FM, Hetzel DJ, et al. Omeprazole v ranitidine for prevention of relapse in reflux oesophagitis. A controlled double blind trial of their efficacy and safety. *Gut* [Internet]. 1994 May 1;35(5):590–8. Available from: <http://gut.bmj.com/cgi/doi/10.1136/gut.35.5.590>
14. Pilotto A, Ndro GLEA, Anceschi MFR, Alf BEH, The OF, Eing AG, et al. Short- and long-term therapy for reflux oesophagitis in the elderly : a multi-centre , placebo-controlled study with pantoprazole. 2003;1399–406.
